# Supplementary material for: Neurological symptoms in acute COVID-19 infected patients: A survey among Italian physicians
Source: PubMed Central journal article supplement (PMC7489055; doi:10.1371/journal.pone.0238159), 2020-09-11
Supplement: pone.0238159.s001.pdf [file pone.0238159.s001.pdf]

# Questionario sulla presenza di sintomi neurologici nel paziente affetto da SARS-CoV-2

Università degli Studi di Milano  
Clinica Neurologica III  
Dipartimento di Scienze della Salute  
Polo Universitario San Paolo  
ASST Santi Paolo e Carlo  
Milano

Gentile Collega,

Secondo dati preliminari dei colleghi cinesi (Mao L et al, 2020\*), circa il 36% dei pazienti affetti da COVID19 riferisce sintomi neurologici fra i quali alterazioni dello stato di coscienza, disturbi cerebrovascolari e interessamento muscolare. Questi sintomi sarebbero più comuni nei pazienti con forme severe di malattia ma non è ancora chiaro se siano espressione del quadro sistemico o siano determinati da un coinvolgimento diretto del sistema nervoso. Tale ipotesi potrebbe essere supportata dal fatto che l'invasione del sistema nervoso centrale è documentata per altre forme di coronavirus. Lo studio del coinvolgimento del sistema nervoso potrebbe avere rilevanza nella migliore definizione del quadro clinico. Al fine di impostare uno studio sistematico sull'argomento, ti saremmo grati se volessi compilare questo breve questionario anonimo rivolto ai medici che si stanno confrontando con questi pazienti. Ti saremmo altresì grati se volessi condividerlo con altri colleghi impegnati in questa epidemia.

Il questionario è anonimo ma, nel caso fossi interessato a partecipare alla prosecuzione dello studio, ti invitiamo a segnalarcelo tramite mail (oggetto "NEUROCOVID19") all'indirizzo di posta [segr.neurostimolazione@unimi.it](mailto:segr.neurostimolazione@unimi.it). Ti ringraziamo anticipatamente per il tempo che ci vorrai concedere e rimaniamo a tua disposizione per ogni suggerimento.

Prof. Alberto Priori  
[alberto.priori@unimi.it](mailto:alberto.priori@unimi.it)

Dr. Laura Campiglio  
[laura.campiglio@asst-santipaolocarlo.it](mailto:laura.campiglio@asst-santipaolocarlo.it)

\* Mao L, Wang, M, Chen S, Quanwei H et al. Neurological Manifestations of Hospitalized Patients with COVID-19 in Wuhan, China: A Retrospective Case Series Study (February 24, 2020).

Available at SSRN: <https://ssrn.com/abstract=3544840>

\* Required

1. Area di specializzazione: \*

- Medico d'emergenza-urgenza
- Internista
- Pneumologo
- Infettivologo
- Anestesista Rianimatore
- Neurologo
- Cardiologo
- Chirurgo
- Pediatra
- Altro

## 2. In quale regione esercita? \*

- Abruzzo
- Basilicata
- Calabria
- Campania
- Emilia Romagna
- Friuli Venezia e Giulia
- Lazio
- Liguria
- Lombardia
- Marche
- Molise
- Piemonte
- Puglia
- Sardegna
- Sicilia
- Toscana
- Trentino Alto Adige
- Umbria
- Valle d'Aosta
- Veneto

3. Approssimativamente quanti pazienti affetti da COVID-19 ha valutato? \*

< 10

10 - 30

30 - 50

> 50

4. Valuti la frequenza di questi sintomi nel paziente affetto da COVID19: \*

|             | assente                  | bassa                    | moderata                 | alta                     |
|-------------|--------------------------|--------------------------|--------------------------|--------------------------|
| Tosse secca | <input type="checkbox"/> | <input type="checkbox"/> | <input type="checkbox"/> | <input type="checkbox"/> |
| Febbre      | <input type="checkbox"/> | <input type="checkbox"/> | <input type="checkbox"/> | <input type="checkbox"/> |
| Astenia     | <input type="checkbox"/> | <input type="checkbox"/> | <input type="checkbox"/> | <input type="checkbox"/> |
| Dispnea     | <input type="checkbox"/> | <input type="checkbox"/> | <input type="checkbox"/> | <input type="checkbox"/> |
| CID         | <input type="checkbox"/> | <input type="checkbox"/> | <input type="checkbox"/> | <input type="checkbox"/> |

5. Valuti la frequenza di queste alterazioni di laboratorio: \*

|                           | assente                  | bassa                    | moderata                 | alta                     |
|---------------------------|--------------------------|--------------------------|--------------------------|--------------------------|
| Linfopenia                | <input type="checkbox"/> | <input type="checkbox"/> | <input type="checkbox"/> | <input type="checkbox"/> |
| Linfocitosi               | <input type="checkbox"/> | <input type="checkbox"/> | <input type="checkbox"/> | <input type="checkbox"/> |
| Rialzo delle transaminasi | <input type="checkbox"/> | <input type="checkbox"/> | <input type="checkbox"/> | <input type="checkbox"/> |
| Rialzo dell'LDH           | <input type="checkbox"/> | <input type="checkbox"/> | <input type="checkbox"/> | <input type="checkbox"/> |
| Rialzo delle CPK          | <input type="checkbox"/> | <input type="checkbox"/> | <input type="checkbox"/> | <input type="checkbox"/> |

6. In quanti pazienti affetti da COVID19 ha notato la presenza di sintomi neurologici? \*

|         | 1                     | 2                     | 3                     | 4                     | 5                     |       |
|---------|-----------------------|-----------------------|-----------------------|-----------------------|-----------------------|-------|
| Nessuno | <input type="radio"/> | <input type="radio"/> | <input type="radio"/> | <input type="radio"/> | <input type="radio"/> | Tutti |

## 7. Valuti la frequenza dei seguenti sintomi neurologici nei pazienti affetti da COVID19 \*

|                                        | assente                  | bassa                    | moderata                 | alta                     |
|----------------------------------------|--------------------------|--------------------------|--------------------------|--------------------------|
| Confusione/delirium                    | <input type="checkbox"/> | <input type="checkbox"/> | <input type="checkbox"/> | <input type="checkbox"/> |
| Sopore                                 | <input type="checkbox"/> | <input type="checkbox"/> | <input type="checkbox"/> | <input type="checkbox"/> |
| Agitazione                             | <input type="checkbox"/> | <input type="checkbox"/> | <input type="checkbox"/> | <input type="checkbox"/> |
| Cefalea                                | <input type="checkbox"/> | <input type="checkbox"/> | <input type="checkbox"/> | <input type="checkbox"/> |
| Segni meningei                         | <input type="checkbox"/> | <input type="checkbox"/> | <input type="checkbox"/> | <input type="checkbox"/> |
| Crisi epilettiche                      | <input type="checkbox"/> | <input type="checkbox"/> | <input type="checkbox"/> | <input type="checkbox"/> |
| Disturbi visivi                        | <input type="checkbox"/> | <input type="checkbox"/> | <input type="checkbox"/> | <input type="checkbox"/> |
| Alterazioni di gusto/olfatto           | <input type="checkbox"/> | <input type="checkbox"/> | <input type="checkbox"/> | <input type="checkbox"/> |
| Alterazioni Udito                      | <input type="checkbox"/> | <input type="checkbox"/> | <input type="checkbox"/> | <input type="checkbox"/> |
| Disfagia                               | <input type="checkbox"/> | <input type="checkbox"/> | <input type="checkbox"/> | <input type="checkbox"/> |
| Disturbi di coordinazione/equilibrio   | <input type="checkbox"/> | <input type="checkbox"/> | <input type="checkbox"/> | <input type="checkbox"/> |
| Tremori/spasmi                         | <input type="checkbox"/> | <input type="checkbox"/> | <input type="checkbox"/> | <input type="checkbox"/> |
| Parestesie                             | <input type="checkbox"/> | <input type="checkbox"/> | <input type="checkbox"/> | <input type="checkbox"/> |
| Paralisi flaccida                      | <input type="checkbox"/> | <input type="checkbox"/> | <input type="checkbox"/> | <input type="checkbox"/> |
| Mialgie                                | <input type="checkbox"/> | <input type="checkbox"/> | <input type="checkbox"/> | <input type="checkbox"/> |
| Astenia generalizzata                  | <input type="checkbox"/> | <input type="checkbox"/> | <input type="checkbox"/> | <input type="checkbox"/> |
| Disautonomia (es.ipotensione, aritmie) | <input type="checkbox"/> | <input type="checkbox"/> | <input type="checkbox"/> | <input type="checkbox"/> |

8. Le è capitato di valutare un paziente per sintomatologia neurologica riscontrando in seguito positività per COVID19? \*

|     | 1                     | 2                     | 3                     | 4                     | 5                     |        |
|-----|-----------------------|-----------------------|-----------------------|-----------------------|-----------------------|--------|
| Mai | <input type="radio"/> | <input type="radio"/> | <input type="radio"/> | <input type="radio"/> | <input type="radio"/> | Spesso |

9. Nel caso si sia presentata l'eventualità descritta nella precedente domanda, ritiene che i sintomi neurologici e l'infezione da COVID19:

- Non siano correlabili ma coincidenti (es. infezione contratta dopo l'accesso in Ospedale)
- Siano probabilmente correlabili (es. ipossia e confusione)
- Vi sia una correlazione causa-effetto fra l'infezione da COVID e i sintomi neurologici
- Other: \_\_\_\_\_

---

This content is neither created nor endorsed by Google.

Google Forms
